# Supplementary material
Source: publisher figshare collection journal article supplement (https://tandf.figshare.com/articles/dataset/_/23920556)
Supplement: Supplementary file 1 [file 1]

| **Table 1**. Demographics | | |
| --- | --- | --- |
|  | *n* | % |
| Participants | 1120 |  |
| Sex |  |  |
| male | 1098 | 98.0 |
| female | 22 | 2.0 |
| Age |  |  |
| <= 25 y | 94 | 8.4 |
| 26-30 y | 181 | 16.2 |
| 31-35 y | 217 | 19.4 |
| 36-40 y | 249 | 22.2 |
| 41-45 y | 258 | 23.0 |
| >= 46 y | 121 | 10.8 |
| Participants with at least four completed measurement points and at least one IES-R score >= 25. | | |
